# Supplementary material for: Short-term treatment with a gonadotropin-releasing hormone antagonist, cetrorelix, in rheumatoid arthritis (AGRA): a randomized, double-blind, placebo-controlled study
Source: PubMed Central journal article supplement — Scand J Rheumatol. 2013 Nov 1;43(1):22–7. doi: 10.3109/03009742.2013.825007 (PMC3913106; doi:10.3109/03009742.2013.825007), 2013-11-01
Supplement: RHE-43-22-s1.pdf [file RHE-43-22-s1.pdf]

**Web Supplement: Supplementary Appendix and Consort 2010 Checklist**

Short-Term Treatment with a Gonadotropin-Releasing Hormone

Antagonist, Cetrorelix, in Rheumatoid Arthritis (AGRA):

A Randomised, Double-Blind, Placebo-Controlled Trial

Anita Suri Kåss MBChB Hons, Øystein Torleiv Førre MD PhD, Morten Wang

Fagerland PhD, Hans Christian Gulseth MD, Peter Abusdal Torjesen PhD,

Ivana Hollan MD PhD

## **Detailed Inclusion and Exclusion criteria**

Patients had a disease-activity score based on 28 joint count (DAS28)  $>3.2$ , with an active disease defined as at least 2 of the following criteria:  $\geq 6$  painful joints,  $\geq 3$  swollen joints, erythrocyte sedimentation rate (ESR)  $\geq 20$  mm/h or a C-reactive protein (CRP)  $\geq 10$ mg/L.

Menstruating women could only enter the study in the early follicular phase of their menstrual cycle. The concomitant use of stable doses of disease-modifying anti-rheumatic drugs (DMARDs) for at least 8 weeks, stable prednisolone  $\leq 7.5$  mg daily for at least 4 weeks, and stable non-steroidal anti-inflammatory drugs (NSAIDs) for at least 2 weeks was allowed if these doses were continued throughout the study. Key exclusion criteria were as follows: pregnancy or breastfeeding females; corticosteroid injections within the trial or 4 weeks prior to screening; biological agents were not permitted during the trial or within 4 weeks prior to inclusion in the trial (with the exception of infliximab or adalimumab which were not permitted within 3 months prior to inclusion in the trial; and rituximab which was not permitted within 6 months prior to inclusion in the trial). A history of hormone-dependent cancers ever or non-hormone-dependent cancers within 5 years prior to screening; infections requiring intravenous antibiotic treatment within 30 days, or oral antibiotics within 14 days prior to enrolment; significant renal or hepatic impairment; and any treatment with hormone replacement therapy or oral contraception were also exclusion criteria.

During the first three months, patients with disease duration  $>36$  months or patients taking concomitant NSAIDs and prednisolone were also excluded. Due to slow recruitment, these stricter criteria were removed after the first 6 patients were enrolled. This change was not expected to bias our results, and allowed data generated by this trial to be generalised to a wider RA population.

### **TNF- $\alpha$ Assay**

TNF- $\alpha$  was measured using a high sensitivity bead-based fluorescence immunoassay (Luminex Inc., Austin, Texas, USA) with multiplex technology according to the manufacturers' instructions. No significant variation was noted between duplicates for any sample. Identical lots of critical reagent, of negligible cross reactivity <2%, was supplied by Biorad, Hercules, California, USA. Samples were assayed together within the same microplate on the same day. The assay sensitivity for TNF- $\alpha$  was 0.5 pg/mL. Due to its skewed distribution, the statistical analysis gives both the log and relative change (%) of TNF- $\alpha$  from baseline.

### **Hormone Assays**

Non-competitive immunofluorometric assays were used for the quantitative determination of serum LH and FSH (Dissociation Enhanced Lanthanide Fluoroimmunoassay [DELFLIA] kit, Turku, Finland). A competitive immunofluorometric assay was used for the determination of serum oestradiol (DELFLIA kit, Turku, Finland). A competitive radioimmunoassay was used for the quantitative determination of serum testosterone (Orion Diagnostica, Espoo, Finland). A competitive luminoimmunoassay was used for the quantitative determination of serum cortisol (Immulin 2000, California, USA).

### **Further Statistical Analyses**

The sample size calculation was based on a two-sided significance level of 5% and a power of 80%. Assuming a 10% dropout rate, the trial needed to enrol 49 patients per treatment group to detect a between-group difference of 0.6 DAS28 units with a standard deviation (SD) of 1.0.

Dichotomous endpoints were compared with the Pearson chi-squared test or the Suissa-Shuster exact unconditional test, depending on the distribution of expected values (1). The Newcombe hybrid score interval was used to estimate 95% confidence intervals (CI) for the difference between proportions (2). No adjustments for multiple analyses were made, owing to the highly correlated variables. All clinical, biochemical, and safety data were analysed by an intention-to-treat analysis. Only predefined endpoints are presented. The intention-to-treat population was predefined in the protocol as all randomised patients who received any injections of study drug. Missing values were <1% and could, as predefined, be imputed with the last observation carried forward. The assumptions of normality needed for analyses were approximately valid. The Spearman rank correlation coefficient (Spearman's rho) was used to estimate the association between pairs of continuous variables.

## **Supplementary Results**

### Cetorelix onset and offset effect

LH and FSH remained stable in the placebo group (Figure 1C in main article shows change from baseline in LH). Although LH and FSH were reduced as early as day 2 in patients allocated to cetorelix, there were no significant changes in clinical endpoints compared with patients allocated to placebo until maximal suppression of LH and FSH by day 5. As expected by day 10, LH and FSH increased towards baseline levels after cessation of cetorelix, with further increases towards baseline by day 15. The same trend was observed with DAS28CRP and with secondary endpoints. No variables in the cetorelix group exceeded baseline levels after drug cessation. This rapid offset effect was expected owing to the short half-life of cetorelix.

### Core set measures

Each core set measure of disease activity showed non-significant greater improvements in the cetorelix group compared with the placebo group except for the physician global assessment which was equally reduced in both groups.

**Figure S1: Trial Flow Chart**

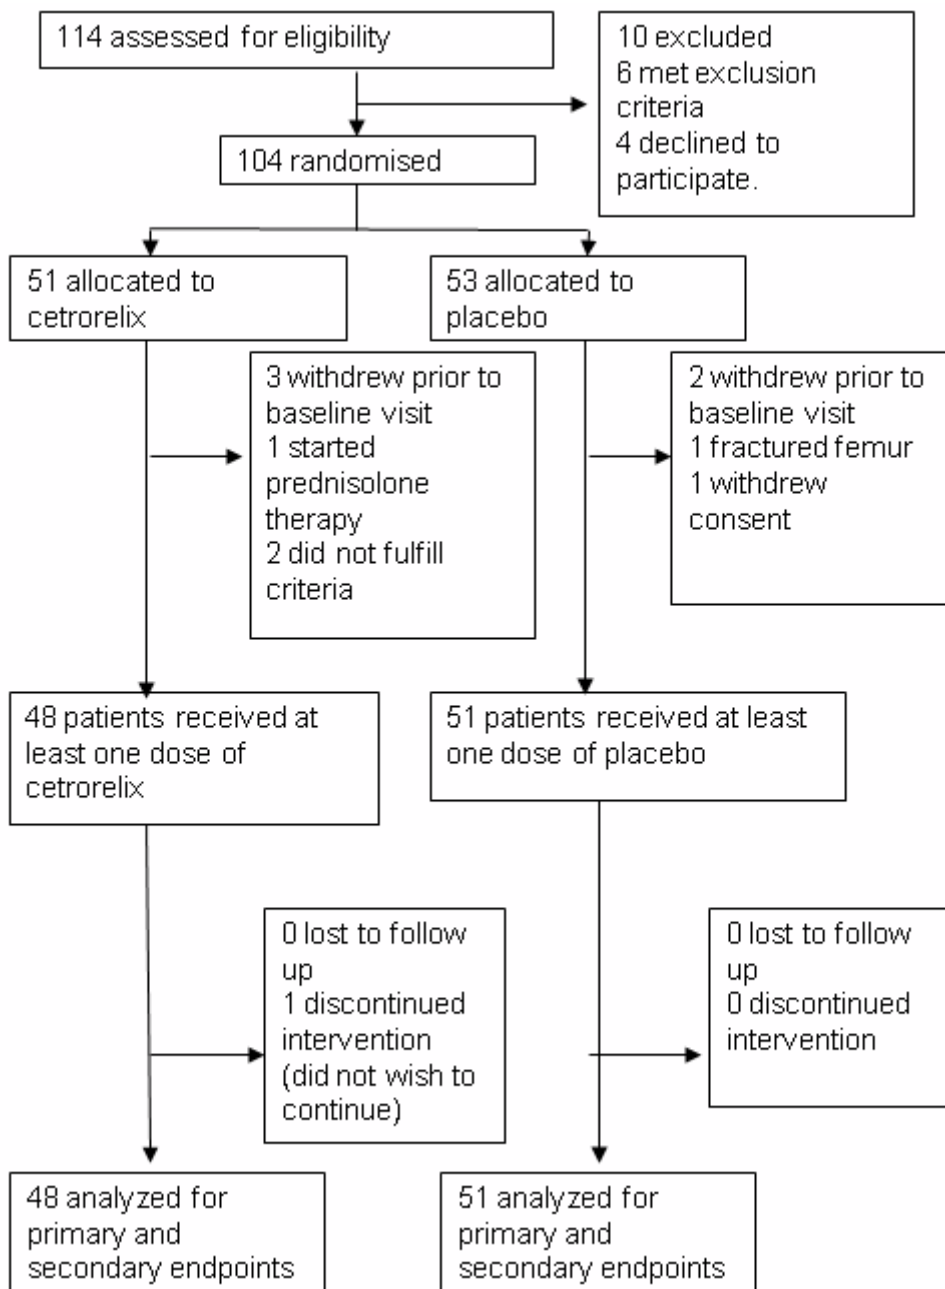

**Table S1: All adverse events during the study period\***

| <b>Event</b>              | <b>Cetrotide, N=48</b> | <b>Placebo, N=51</b> |
|---------------------------|------------------------|----------------------|
|                           | <i>n (percent)</i>     | <i>n (percent)</i>   |
| Headache                  | 2 (4.2)                | 6 (11.8)             |
| Injection site discomfort | 3 (6.3)                | 0                    |
| Nausea                    | 0                      | 3 (5.9)              |
| Menstrual spotting        | 2 (4.2)                | 0                    |
| Hot flushes               | 2 (4.2)                | 0                    |
| Toothache                 | 0                      | 1 (2.1)              |
| Urinary tract infection   | 1 (2.1)                | 0                    |
| Nasopharyngitis           | 1 (2.1)                | 0                    |

\* There were no significant between-group differences.

## References

1. Lydersen S, Fagerland MW, Laake P. Recommended tests for association in  $2 \times 2$  tables. *Stat Med* 2009; 28: 1159-75.
2. Fagerland MW, Lydersen S, Laake P. Recommended confidence intervals for two independent binomial proportions. *Stat Methods Med Res* 2011; (In press, accessed 7th July, 2013, at <http://smm.sagepub.com/content/early/2011/10/11/0962280211415469.long>)



CONSORT 2010 checklist

| Section/Topic             | Item No. | Checklist Item                                                                                                                        | Page No.                         |
|---------------------------|----------|---------------------------------------------------------------------------------------------------------------------------------------|----------------------------------|
| Title and Abstract        |          |                                                                                                                                       |                                  |
|                           | 1a       | Identification as a randomised trial in the title                                                                                     | Title                            |
|                           | 1b       | Structured summary of trial design, methods, results and conclusion (see CONSORT abstract checklist)                                  | Abstract                         |
| Introduction              |          |                                                                                                                                       |                                  |
| Background and objectives | 2a       | Scientific background and explanation of rationale                                                                                    | P3-4                             |
|                           | 2b       | Scientific objectives or hypotheses                                                                                                   | P4 (Further details in protocol) |
| Methods                   |          |                                                                                                                                       |                                  |
| Trial design              | 3a       | Description of trial design                                                                                                           | P5                               |
|                           | 3b       | Important changes to methods after trial commencement (such as eligibility criteria). With reasons                                    | Supplement                       |
| Participants              | 4a       | Eligibility criteria for participants                                                                                                 | P5+ Supplement                   |
|                           | 4b       | Settings and locations where the data were collected                                                                                  | P5                               |
| Interventions             | 5        | The interventions for each group with sufficient details to allow replication, including how and when they were actually administered | P5+ Supplement                   |
| Outcomes                  | 6a       | Completely defined pre-specified primary and secondary outcome measures, including how and when they were assessed                    | P5                               |
|                           | 6b       | Any changes to trial outcomes after the trial commenced with reasons                                                                  | -                                |
| Sample size               | 7a       | How sample size was determined                                                                                                        | Supplement                       |
|                           | 7b       | When applicable, explanation of any interim analyses and stopping guidelines                                                          | - Protocol has criteria for      |

|                                  |     |                                                                                                                                                           |                                                        |
|----------------------------------|-----|-----------------------------------------------------------------------------------------------------------------------------------------------------------|--------------------------------------------------------|
|                                  |     |                                                                                                                                                           | termination of trial. No planned interim analyses      |
| Randomization                    |     |                                                                                                                                                           |                                                        |
| Sequence generation              | 8a  | Method used to generate the random allocation sequence                                                                                                    | P5                                                     |
|                                  | 8b  | Type of randomization, details of any such restriction (such as blocking and block size)                                                                  | P5                                                     |
| Allocation concealment mechanism | 9   | Mechanism used to implement the random allocation sequence (such as sequentially numbered containers), describing any steps taken to conceal the sequence | P5-6                                                   |
| Implementation                   | 10  | Who generated the random allocation sequence, who enrolled participants, and who assigned participants to interventions                                   | P5-6                                                   |
| Blinding                         | 11a | If done, who was blinded after assignment o interventions (for example, participants, care providers, those assessing outcomes) and how.                  | P6                                                     |
|                                  | 11b | If relevant, description of the similarity of interventions                                                                                               | P5                                                     |
| Statistical methods              | 12a | Statistical methods used to compare groups for primary and secondary outcomes                                                                             | P5-6+<br>Supplement                                    |
|                                  | 12b | Methods for additional analyses, such as subgroup analyses and adjusted analyses                                                                          | -                                                      |
| Results                          |     |                                                                                                                                                           |                                                        |
| Participant flow                 | 13a | For each group, the numbers of participants who were randomly assigned received intended treatment, and were analysed for the primary outcome             | Supplement:<br>Figure S1                               |
|                                  | 13b | For each group, losses and exclusions after randomization, together with reasons                                                                          | Supplement:<br>Figure S1                               |
| Recruitment                      | 14a | Dates defining the periods of recruitment and follow up                                                                                                   | Removed due to word limit (was in original manuscript) |

|                         |     |                                                                                                                                         |                                                               |
|-------------------------|-----|-----------------------------------------------------------------------------------------------------------------------------------------|---------------------------------------------------------------|
|                         | 14b | Why the trial ended or was stopped                                                                                                      | -                                                             |
| Baseline data           | 15  | A table showing baseline demographic and clinical characteristics for each group                                                        | Table 1                                                       |
| Numbers analysed        | 16  | For each group, number of participants (denominator) included in each analysis and whether the analysis was by original assigned groups | All tables except where indicated in footnotes                |
| Outcomes and estimation | 17a | For each primary and secondary outcome, results for each group, and the estimated effect size and its precision (such as 95% CI)        | Results in text/ tables.                                      |
|                         | 17b | For binary outcomes, presentation of both absolute and relative effect sizes is recommended                                             | -                                                             |
| Ancillary analyses      | 18  | Results of any other analyses performed including subgroup analyses and adjusted analyses, distinguishing prespecified from exploratory | Only predefined analyses presented with predefined statistics |
| Harms                   | 19  | All important harms or unintended effects in each group (for specific guidance see CONSORT for harms)                                   | P8 and Supplement: Table S1                                   |
| Discussion              |     |                                                                                                                                         |                                                               |
| Limitations             | 20  | Trial limitations, addressing sources of potential bias, imprecision, and if relevant, multiplicity of analyses                         | P10-11                                                        |
| Generalisability        | 21  | Generalisability (external validity, applicability) of the trial findings                                                               | P11                                                           |
| Interpretation          | 22  | Interpretation consistent with results, balancing benefits and harms, and considering other relevant evidence                           | P9-11                                                         |
| Other information       |     |                                                                                                                                         |                                                               |
| Registration            | 23  | Registration and name of trial registry                                                                                                 | Metadata                                                      |
| Protocol                | 24  | Where the full trial protocol can be accessed, if available                                                                             | Enclosed with submission,                                     |

|         |    |                                                                                    |                                                               |
|---------|----|------------------------------------------------------------------------------------|---------------------------------------------------------------|
|         |    |                                                                                    | eventually<br>can be<br>accessed on<br>institution<br>website |
| Funding | 25 | Sources of funding and other support (such as supply of<br>drugs), role of funders | Title page                                                    |
